# Supplementary material for: Hospice delivery models and survival differences in the terminally ill: a large cohort study
Source: HighWire-hosted journal article supplement (doi:10.1136/bmjspcare-2021-003262), 2021-12-16
Supplement: bmjspcare-2021-003262supp002_data_supplement.pdf [file bmjspcare-2021-003262supp002_data_supplement.pdf]

**Supplementary Table 2. Individualized Hospice Care Plan by Patient Characteristics**

| Hospice delivery model | Patient characteristics                                                                                                                    |
|------------------------|--------------------------------------------------------------------------------------------------------------------------------------------|
| Hospice share care     | Noncancer patients, cross-team symptom management, Do-not-resuscitate or hospice care communication                                        |
| Hospice inpatient care | Dyspnea in noncancer or lung cancer patients. Patients with nausea and dysphagia. Ascites, especially in hepatocellular carcinoma patients |
| Hospice home care      | Low to moderate symptom burdens such as colorectal and lung cancer patients. Head and neck cancer patients with fungating wounds           |
